# Supplementary material for: Facile synthesis of novel size-controlled antibacterial hybrid spheres using silver nanoparticles loaded with poly-dopamine spheres
Source: Royal Society of Chemistry journal article supplement (doi:10.1039/c4ra16469e), 2015-01-01
Supplement: c4ra16469e1.pdf [file c4ra16469e1.pdf]

**Facile synthesis of novel size-controlled antibacterial hybrid sphere with silver nanoparticles loaded to poly-dopamine sphere**

Hongyong Luo, Changwei Gu, Xinling Wang, Zhen Zheng\*

(School of Chemistry and Chemical Engineering, State Key Laboratory of Metal Matrix Composites, Shanghai Jiao Tong University, 800 Dongchuan Road, Shanghai 200240, P.R. China)

E-mail: [zzheng@sjtu.edu.cn](mailto:zzheng@sjtu.edu.cn) Fax: +86 21 54741297 Tel: +86-21-54745817

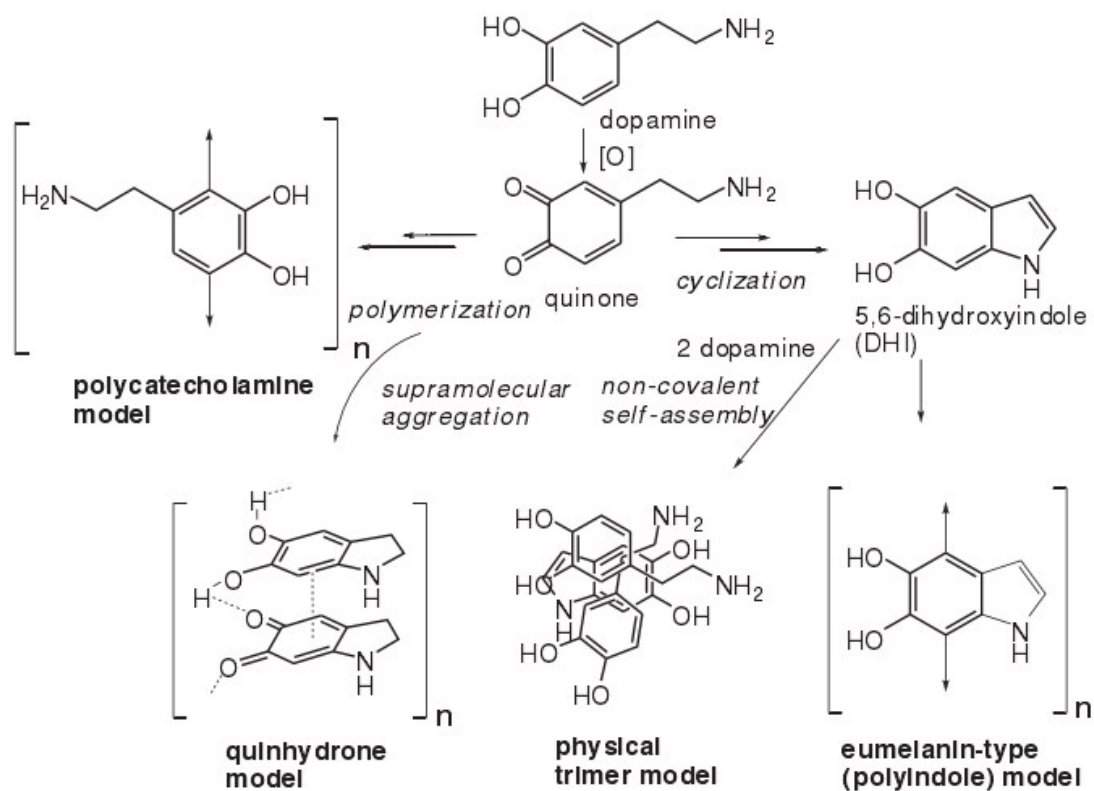

**Fig.S1** Traditional and recent models of the poly-dopamine structure.<sup>16</sup>

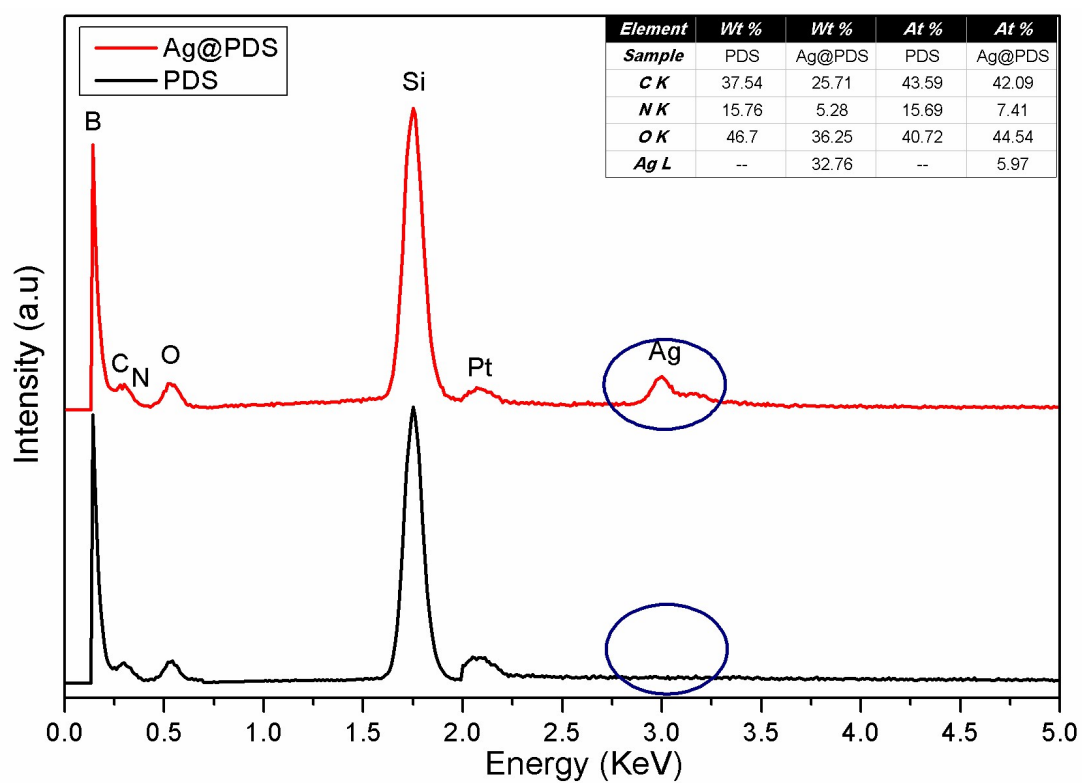

**Fig.S2** SEM-EDS pattern of poly-dopamine sphere loaded with silver nanoparticles (Ag@PDS).

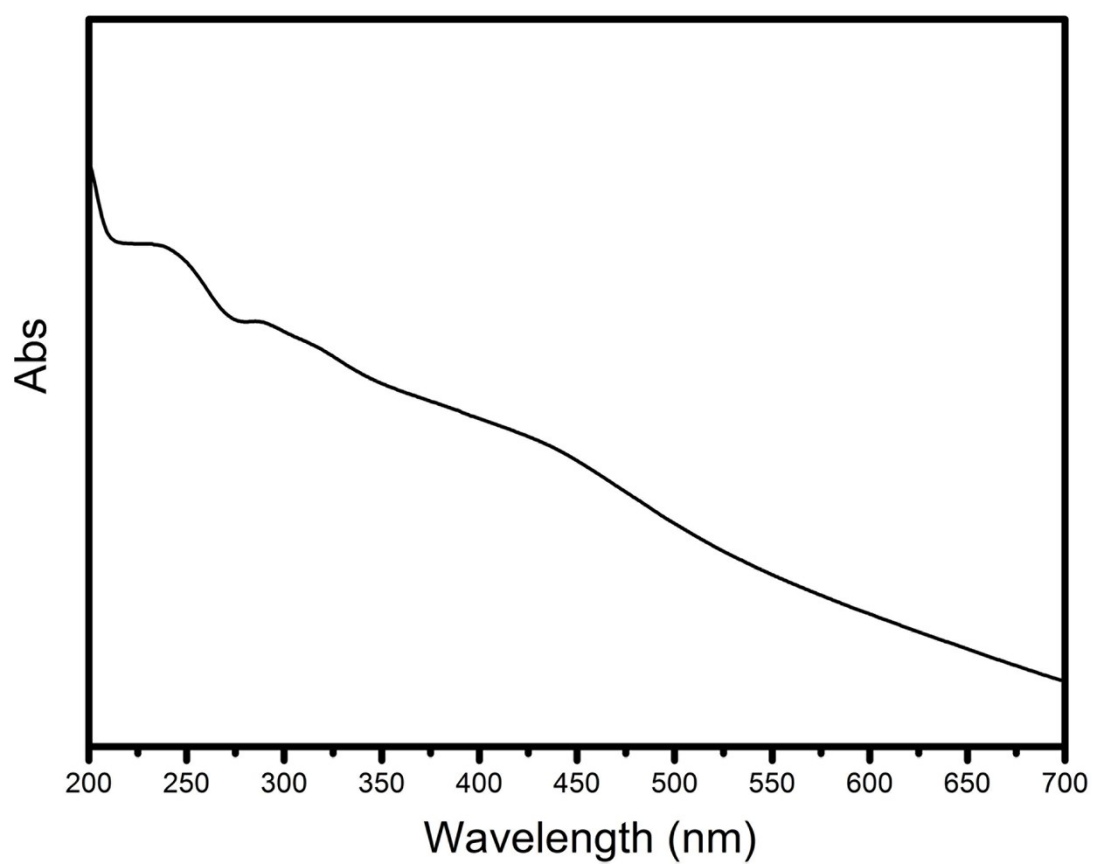

**Fig.S3** UV-Vis spectra of poly-dopamine sphere (PDS).

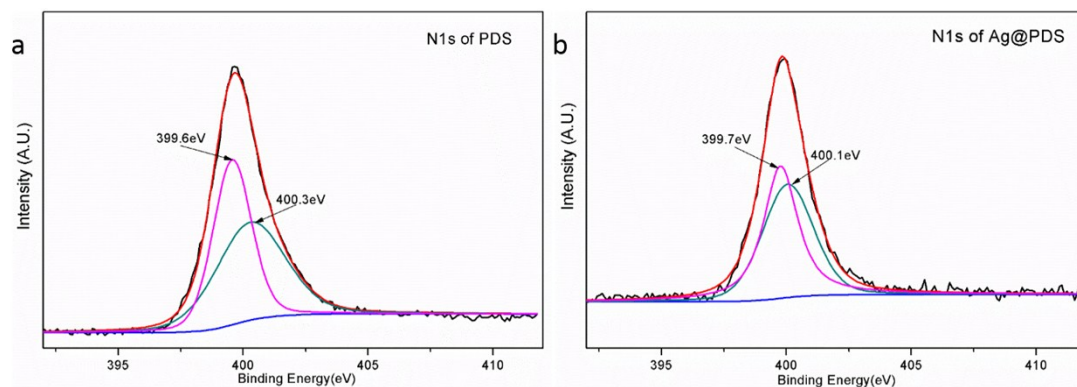

**Fig.S4** N1s X-ray photoelectron spectra (XPS) spectra of (a) poly-dopamine sphere (PDS) and (b) poly-dopamine sphere loaded with silver nanoparticles (Ag@PDS).
